1     **Identification of Bovine Genotypes Conferring Diminished Susceptibility to Salmonellosis**  
2                                     **and Colonization by *Salmonella* and *E. coli* O157:H7**

3

4     Kristi L. Anderson<sup>1</sup>, Duane K. Ramsey<sup>1</sup>, Tim A. Day<sup>1,2</sup>, and Steve A. Carlson<sup>1,2\*</sup>

5

6     <sup>1</sup>PSR Genetics LLC, Gilbert, IA 50105

7     <sup>2</sup>Iowa State University College of Veterinary Medicine, Ames, IA 50011

8

9

10    \* Corresponding author: [steve.carlson.isu@gmail.com](mailto:steve.carlson.isu@gmail.com)

11

12 **ABSTRACT:** *Salmonella* and *E. coli* O157:H7 are two of the most important problems for the  
13 beef industry. Cattle can develop salmonellosis and persistently harbor *Salmonella*, or they can  
14 asymptotically shed *Salmonella* and/or *E. coli* O157:H7 resulting in contamination of the hide  
15 and carcass surfaces during processing. Additionally, *Salmonella* infiltrates lymph nodes that get  
16 incorporated into ground beef. In this study, we investigated the possibility of identifying cattle  
17 with reduced susceptibility to one or both of these infections. Empirical observations from  
18 previous studies suggested that a diminished susceptibility was possible in amelanotic cattle, *i.e.*,  
19 cattle bearing the *mcr1/mcr1* genotype and lacking overt black pigmentation. By searching for  
20 single nucleotide polymorphisms (SNP) present in the 34 genes encoding the *Salmonella*  
21 interactome, we identified a SNP that was consistently present in amelanotic cattle with  
22 diminished susceptibility to *Salmonella*. Specifically, we used an *ex vivo* assay to screen 500  
23 cattle blood samples for the diminished ability of *Salmonella* to penetrate peripheral leukocytes.  
24 Diminished *Salmonella* penetration was observed in 150 of these blood samples and 147 of these  
25 samples harbored two alleles bearing a SNP that introduces a miRNA cleavage site (*bta-let-7b*)  
26 in the 3'UTR of the *bsynJ1* gene, which we designate as the *SYNJI/SNYJI* genotype. Further *ex*  
27 *vivo* studies revealed a decreased expression of *SYNJI* in leukocytes bearing the *SYNJI/SNYJI*  
28 genotype. *In vivo* experimental challenge studies revealed a diminished susceptibility to  
29 salmonellosis in cattle with the *SYNJI/SNYJI::mcr1/mcr1* genotype. Additional *in vivo*  
30 challenge studies revealed that *SYNJI/SNYJI::mcr1/mcr1* cattle have a decreased susceptibility  
31 to lymph node infiltration by two *Salmonella* serotypes (*S. Anatum* and *S. Montevideo*)  
32 implicated in this lymph node problem, and a decreased susceptibility to *E. coli* O157:H7  
33 colonization of the recto-anal junction. A field study revealed that the  
34 *SYNJI/SNYJI::mcr1/mcr1* genotype was five times more prevalent, when compared to the

35 *SYNJI/synj1::mcr1/mcr1* and *synj1/synj1::mcr1/mcr1* genotypes, in *Salmonella*-free lymph  
36 nodes. Small-scale genetic surveys revealed that the *SYNJI/SNYJI* genotype was present in the  
37 following *mcr1/mcr1* breeds: Akaushi, Barzona, Braunvieh, Hereford, Piedmontese, Red and  
38 White Holsteins, Red Angus, Red Poll, Shorthorn, Simmental (Red), and Tarentaise. Studies  
39 using the aforementioned *ex vivo* penetration assay, which putatively predicts the diminished  
40 susceptibility phenotype, revealed that the penetrance of the diminished susceptibility is >99% in  
41 *SYNJI/SNYJI::mcr1/mcr1* cattle but only ~1% in *SYNJI/SNYJI* cattle with at least one *MCR1*  
42 allele. Further studies with the *ex vivo* assay revealed that three additional SNPs are part of a  
43 genotype conferring diminished susceptibility to a broad array of *Salmonella* serotypes  
44 commonly associated with cattle. In summary, the studies presented herein reveal a bovine  
45 genotype associated with decreased susceptibility to *Salmonella* and *E. coli* O157:H7. PSR  
46 Genetics LLC holds a U.S. patent on testing for the *SYNJI/SNYJI* genotype (patent number  
47 9,049,848) while the three complementary SNPs are under further investigation.

48 Key words: *Salmonella*, cattle

49

## 50 **1. Introduction**

51 In cattle, *Salmonella* occasionally cause clinical disease but this pathogen can also be  
52 asymptotically harbored in the intestinal tracts and lymph nodes of cattle. The latter  
53 phenomenon is a food safety concern since lymph nodes serve as a protective conduit for  
54 *Salmonella* passage into ground beef (Brichta-Harhay et al., 2008). The bovine recto-anal junction  
55 is a depot for *E. coli* O157:H7, which is a commensal in cattle but highly pathogenic in humans  
56 (Smith et al., 2014).

57           Given the need to mitigate these two food safety problems and the animal health  
58 problems associated with salmonellosis, identifying novel intervention strategies is critical and  
59 the aim of this study is to identify cattle that are less susceptible to infections by these two  
60 bacteria. Twelve *in vivo* experimental *Salmonella* challenge studies (Brewer et al., 2014; Carlson et  
61 al., 2007; Carlson et al., 2002a; Carlson et al., 2002b; Carlson et al., 2005; McCuddin et al., 2008;  
62 Rasmussen et al., 2005; Wu et al., 2002; Xiong et al., 2013; Xiong et al., 2012; Xiong et al., 2011; Xiong et  
63 al., 2010) revealed that certain calves were less likely to be successfully infected with *Salmonella*  
64 in an experimental setting. Across these 12 studies there were 13 calves that were excluded from  
65 the studies since these animals could not be successfully colonized or did not elicit salmonellosis  
66 after experimental challenge. All 13 calves were from the following amelanotic breeds:  
67 Hereford, Jersey, Red Angus, and Red and White Holstein.

68           The core recessive genotype of amelanotic breeds is *mcr1/mcr1* that leads to a non-  
69 functional or non-expressed melanocortin 1 receptor (Seo et al., 2007). The intact and fully  
70 functional version of the receptor activates a tyrosinase that converts phaeomelanin to eumelanin  
71 that provides black pigmentation. In the absence of functional melanocortin 1 receptors,  
72 phaeomelanin predominates thus yielding a yellowish/red pigmentation (Seo et al., 2007). Other  
73 alleles, such as dilution alleles in white breeds like Charolais (Gutiérrez-Gil et al., 2007), provide  
74 other non-black color patterns in *mcr1/mcr1* cattle (Seo et al., 2007).

75           Since we were able to empirically associate the *mcr1/mcr1* genotype with a putative  
76 phenotype for diminished susceptibility to *Salmonella*, the aims of this study were to search for  
77 single nucleotide polymorphisms (SNP) present in the 34 genes encoding proteins exploited by  
78 *Salmonella* during the infection process, *i.e.*, the *Salmonella* interactome (Schleker et al., 2012b).  
79 We first used an *ex vivo* peripheral leukocyte *Salmonella* penetration assay to find leukocytes

80 that “resisted” *Salmonella* penetration and then we looked for single nucleotide polymorphisms  
81 (SNPs) present in the 34 genes encoding the *Salmonella* interactome. Once a SNP was  
82 correlated with the *ex vivo* “resistance” phenotype, we obtained calves with zero, one, or two  
83 copies of the SNP and performed two different *in vivo* experimental *Salmonella* challenges. One  
84 experimental challenge involved a serotype (*S. Newport*) that causes overt salmonellosis in  
85 calves while the other challenge involved two serovars (*S. anatum* and *S. Montevideo*)  
86 implicated in the lymph node infiltration problem (Brichta-Harhay et al., 2012), along with a co-  
87 challenge of *E. coli* O157:H7. A field study was also performed to investigate the presence of  
88 the SNP in cattle lymph nodes that were free of *Salmonella*.

89 Small-scale genetic screening was also performed in order to uncover the prevalence of  
90 the SNP in various populations of cattle. Studies with samples from melanotic cattle  
91 (*MCRI/MCRI* or *MCRI/mcr1*) were also performed in order to compare the penetrances of the  
92 diminished susceptibility in amelanotic and melanotic cattle. Herein we report the discovery of a  
93 SNP that is present in *mcr1/mcr1* cattle with diminished susceptibility to *Salmonella* and *E. coli*  
94 O157:H7. This diminished susceptibility to *Salmonella* extends to a broad array of *Salmonella*  
95 serotypes if three additional SNPs are present. PSR Genetics LLC has a proprietary claim on the  
96 SNP present in the *Salmonella* interactome (US patent number 9,049,848) while the three  
97 complementary SNPs are under further investigation.

98

## 99 **2. Materials and Methods**

### 100 *2.1. Ex vivo screening for decreased susceptibility to Salmonella*

101 Since previous 12 *in vivo* studies suggested that amelanotic cattle could be a population  
102 to look for animals with decreased susceptibility to *Salmonella*, we obtained blood samples from

103 approximately 500 amelanotic cattle from the following breeds or crosses of these breeds:  
104 Braunvieh, Hereford, Piedmontese, Red & White Holsteins, Red Angus, Shorthorn, Simmental,  
105 and Tarentaise. As a Control, blood was taken from about the same number of melanotic cattle  
106 representing the Angus and Black & White Holstein breeds. About 5mL of whole blood was  
107 collected from the caudal vein, placed in EDTA tubes and immediately used in the *ex vivo*  
108 *Salmonella* susceptibility assay. Blood was subjected to centrifugation and the erythrocyte  
109 fraction was removed. Approximately  $10^7$  colony-forming units (CFUs) of a standard *S.*  
110 *enterica* serotype Typhimurium strain [SL1344; (Wray and Sojka, 1978)] was then added to the  
111 cells. As a Control, cells were incubated with non-invasive standard *S. enterica* serotype  
112 Typhimurium strain BJ68 (Penheiter et al., 1997). After 12 hours of incubation at 37°C,  
113 extracellular (non-invasive) bacteria were killed by adding an equivalent volume of PBS  
114 containing 100µg/ml (final concentration equal to 50µg/ml) of gentamicin- a bactericidal  
115 antibiotic that rapidly kills extracellular bacteria but does not penetrate eukaryotic cells (Gianella  
116 et al., 1973). Samples were then incubated at 37°C for 1 hour to ensure that all non-invasive  
117 bacteria are killed. Leukocytes were centrifuged and the gentamicin-containing media was  
118 removed and replaced with 50µL of phosphate-buffered saline containing 1% Triton which lyses  
119 the leukocytes. Lysates were then plated on XLD agar that was incubated overnight at 37°C.  
120 The following day, black-centered colonies were enumerated and the invasion/survival of  
121 *Salmonella* was then calculated as a percent that equals  $100(\text{number of } Salmonella \text{ recovered}$   
122  $\text{from within leukocytes}/10^7)$ .

123

## 124 2.2. Screening for SNPs in the 34 genes encoding the *Salmonella* interactome

125 A literature search revealed the existence of a SNP in the 3' UTR of the gene encoding

126 synaptojanin (Cargill et al., 2008), a protein that *Salmonella* exploits during the invasion process  
127 (Marcus et al., 2001). To screen for this SNP that is a C to T substitution at nucleotide 3981, we  
128 used a PCR assay (Forward oligonucleotide = 5'-AACCACCAGAGTAACAGACTACAC-3';  
129 Reverse oligonucleotide = 5'-ATGCAGCTTACAGAACTCAGAGT-3') to amplify a 362bp  
130 region encompassing the SNP. Dideoxynucleotide sequencing was used to evaluate PCR  
131 amplicons for the presence of the SNP, with an ambiguous signal indicating heterozygosity as  
132 per Fig. 2. We hereby designated the C to T substitution at nucleotide 3981 as the *SYNJI* allele  
133 while the “wild-type” is the *synjI* allele.

134

### 135 2.3. *Assessment of Synaptojanin Gene Expression in Leukocytes*

136 Semi-quantitative RT-PCR was performed on blood samples obtained from cattle. RNA  
137 was isolated using the Blood RNEasy kit (Qiagen) and RT-PCR was performed as described  
138 previously described (Carlson et al., 2007). Our empirical studies revealed that amplification was  
139 consistently variable across the three genotypes between 10 and 15 cycles of PCR. As such, we  
140 used 12 cycles as an arbitrary time point to stop the reaction and visualize the amplicons using  
141 agarose gel electrophoresis.

142

### 143 2.4. *In vivo experimental challenge with Salmonella Newport*

144 Calves (2-6 months of age) with the nine possible combinations of *synjI*, *SYNJI*, *MCR1*,  
145 and *mcrI* genotypes were obtained and orally challenged with 10<sup>9</sup> CFUs/kg of a multi-resistant  
146 strain of *Salmonella* Newport as per previous studies (Brewer et al., 2014; Carlson et al., 2007;  
147 Carlson et al., 2002a; Carlson et al., 2002b; Carlson et al., 2005; McCuddin et al., 2008; Rasmussen et al.,  
148 2005; Wu et al., 2002; Xiong et al., 2013; Xiong et al., 2012; Xiong et al., 2011; Xiong et al., 2010). Each

149 day, calves were evaluated for four clinical signs of salmonellosis- *Salmonella* fecal shedding  
150 (assessed by qualitative fecal culture using XLD agar), diarrhea, pyrexia (rectal temperature  
151  $\geq 103.5^{\circ}\text{F}$ ), and  $\geq 4\%$  dehydration based on a skin tent test. An arbitrary clinical score was  
152 ascribed daily whereby a +1 was given for each of the four clinical parameters, *i.e.*, a score equal  
153 to 4 indicates the simultaneous observation of all four signs on a given day. Animals were  
154 immediately euthanized (IM xylazine followed by IV pentobarbital) if any of the following were  
155 observed: recumbency, anorexia, profuse diarrhea, rectal temperature  $> 106^{\circ}\text{F}$ , or dehydration  
156  $> 6\%$ . Animals requiring euthanasia were ascribed a clinical score equal to 5 on the day of  
157 euthanasia. This experimental protocol was performed twice using three calves for each of the  
158 nine possible genotypes in each experiment, *i.e.*, a total of 54 calves. For  
159 *SYNJI/SYNJI::mcr1/mcr1* cattle, a third experiment was performed with five calves that  
160 received a ten-fold higher dose ( $10^{10}$  CFUs/kg) of *S. Newport*.

161

## 162 2.5. *In vivo* experimental challenge with *Salmonella* Anatum and Montevideo

163 Calves (2-6 months of age) possessing one of the nine possible combinations of *synj1*,  
164 *SYNJI*, *MCRI*, and *mcr1* genotypes were obtained and orally challenged with  $10^9$  CFUs/kg of a  
165 1:1 cocktail of multi-resistant strains of *Salmonella* Anatum and Montevideo (Brichta-Harhay et  
166 al., 2012) as per previous studies (Brewer et al., 2014; Carlson et al., 2007; Carlson et al., 2002a;  
167 Carlson et al., 2002b; Carlson et al., 2005; McCuddin et al., 2008; Rasmussen et al., 2005; Wu et al.,  
168 2002; Xiong et al., 2013; Xiong et al., 2012; Xiong et al., 2011; Xiong et al., 2010). Each day, calves  
169 were evaluated for unexpected clinical signs of salmonellosis. On day 14 post-challenge, calves  
170 were euthanized (IM xylazine followed by IV pentobarbital) and six lymph nodes (superficial  
171 cervical, subiliac, popliteal, tuberal, gluteal, and ileocecal) were recovered from each calf.



172 Lymph nodes were then subjected to quantitative culture of *Salmonella* as per Feye *et al.* (Feye et  
173 al., 2016). This experimental protocol was performed once using 12 calves with the  
174 *SYNJI/SYNJI::mcr1/mcr1* genotype and 16 calves representing the other eight possible genotype  
175 combinations of *synj1*, *SYNJI*, *MCR1*, and *mcr1*.

176

#### 177 2.6. Assessment of *SYNJI* Genotypes in Cattle with *Salmonella*-free Lymph Nodes

178 In order to correlate the absence of *Salmonella* with the *synj1*, *SYNJI*, *MCR1*, and *mcr1*  
179 genotypes, *Salmonella*-free lymph nodes (n=200) from a Control group from a prior study (Feye  
180 et al., 2016) were subjected to PCR-based genotyping targeting the *synj1*, *SYNJI*, *MCR1*, and  
181 *mcr1* alleles. DNA was extracted from the lymph nodes, and then subjected to the PCR-based  
182 sequencing procedure described herein.

183

#### 184 2.7. In vivo experimental challenge with *E. coli* O157:H7

185 Calves experimentally infected with *S. Anatum* and Montevideo were also infected with  
186 10<sup>10</sup> CFUs/kg of *E. coli* O157:H7 strain isolated from our recent study (Feye et al., 2016). On day  
187 14 post-challenge, approximately 0.3 gm of recto-anal junction scrapings were collected and  
188 transferred into enrichment broth (Sharma and Casey, 2014) and an aliquot of the broth was plated  
189 on sorbitol-MacConkey agar, incubated overnight at 37°C, and subjected to enumeration by  
190 manual counting of non-fermenting colonies the next day. From each genotype-specific set of  
191 agar plates, 96 colonies were selected and subjected to the PCR targeting *E. coli* O157:H7  
192 virulence genes (Sharma and Casey, 2014). Load was then determined as (colonies recovered  
193 times the dilution factor times the percent of colonies yielding an *E. coli* O157H7-specific  
194 amplicon)/gm of feces. Prevalence was calculated as percent of harboring any *E. coli* O157:H7

195 within a genotype, and was compiled across genotypes.

196

## 197 2.8. *Small-scale Assessment of synj1 and SYNJI Genotypes in Various Cattle Breeds*

198 Blood was obtained from the following *mcr1/mcr1* breeds: Akaushi (n=24), Barzona  
199 (n=30), Braunvieh (n=100), Hereford (n=3), Piedmontese (n=35), Red and White Holsteins  
200 (n=20), Red Angus (n=160), Red Poll (n=40), Shorthorn (n=4), Red Simmental (n=20), and  
201 Tarentaise (n=40). Blood was also collected from the following *MCR1* breeds: Black and White  
202 Holsteins (n=250), Black Angus (n=250), and Black Simmental (n=5). The *ex vivo* invasion  
203 assay was performed using the blood samples in order to determine the penetrance of the  
204 diminished susceptibility relative to the presence of the *SYNJI/SYNJI* genotype.

205

## 206 2.9. *Small-scale Assessment of Diminished Susceptibility to an Array of Salmonella serotypes*

207 The *ex vivo* invasion/survival assay was performed using blood obtained from 100  
208 *SYNJI/SYNJI::mcr1/mcr1* cattle whereby a broad array of *Salmonella* serotypes were used as the  
209 test strains. Specifically, we created and used a pool of 100 *Salmonella* laboratory strains  
210 representing 70 different serotypes known to be isolated from cattle based on a literature search.  
211 These serotypes include *S. Dublin*, *S. Derby*, *S. Reading*, *S. Lubbock*, *etc.* As a Control, the  
212 same pool of *Salmonella* were incubated with blood obtained from *synj1/synj1::MCR1/MCR1*  
213 cattle.

214 Since this pool of *Salmonella* were able to survive within approximately 50% of the  
215 blood samples obtained from *SYNJI/SYNJI::mcr1/mcr1* cattle, we examined potential genotypic  
216 differences between *SYNJI/SYNJI::mcr1/mcr1* cattle whose leukocytes “resisted” the pool of  
217 *Salmonella* serotypes when compared to *SYNJI/SYNJI::mcr1/mcr1* cattle whose leukocytes

218 were most permissive of the invasion/survival of the *Salmonella* pool. To do so, blood samples  
219 were submitted to GeneSeek for 50k SNP analysis. Consensus SNPs were then obtained by  
220 comparing the SNP profiles of “hypo-susceptible” and “susceptible” animals using a proprietary  
221 algorithm.

222

## 223 2.10. *Statistical Analyses*

224 Statistical comparisons were made using an analysis of variance with Tukey’s *ad hoc* test  
225 for multiple comparisons (GraphPad Prism, Version 6, La Jolla, CA). Significant differences  
226 were defined at  $P \leq 0.05$ .

227

## 228 **3. Results**

### 229 3.1. *Ex vivo*-based identification of cattle with decreased susceptibility to *Salmonella*

230 Since our previous 12 *in vivo* studies suggested that amelanotic cattle could be a  
231 population to look for animals with decreased susceptibility to *Salmonella*, we obtained blood  
232 samples from approximately 500 amelanotic cattle and 500 melanotic cattle. Blood was  
233 collected and used in an *ex vivo* *Salmonella* susceptibility assay that measures the eukaryotic cell  
234 invasion and intra-cellular survival of *Salmonella*. Interestingly, the results clustered into four  
235 different arbitrary groups representing a hierarchy of decreased susceptibility to *Salmonella*. As  
236 shown in Fig. 1, the maximal reduction in susceptibility to *Salmonella* was identified in some of  
237 the amelanotic cattle (Group D) while the vast majority of the melanotic cattle clustered into the  
238 most susceptible group (Group A). Blood from four melanotic cattle exhibited a moderate  
239 decrease in susceptibility (Groups B and C), while one melanotic animal yielded blood  
240 displaying the maximal resistance (Group D).

241

### 242 3.2. Screening for SNPs in the 34 genes encoding the *Salmonella* interactome

243 In order to correlate the results depicted in Fig. 1 with a genotype, we examined the  
244 literature for genetic variants in genes encoding the *Salmonella* interactome (Schleker et al.,  
245 2012b). A literature search revealed the existence of a SNP in the 3' UTR of the gene encoding  
246 synaptojanin (Cargill et al., 2008), a protein that *Salmonella* exploits during the invasion process  
247 (Marcus et al., 2001). This SNP introduces part of an RNAi-cleavage site (*bta-let-7b*) into the  
248 gene, and this site could reduce the expression of this gene (Cargill et al., 2008). Using blood  
249 obtained from studies presented in Fig. 1, we used a PCR-based assay (Fig. 2) to identify the  
250 relative prevalence of this SNP (*i.e.*, the *SYNJI* allele) in the four susceptibility Groups. As  
251 shown in the bottom line of the Table embedded in Fig. 1, the *SYNJI/SYNJI* predominates  
252 Groups C and D. The heterozygous genotype (*SYNJI/synj1*) predominates Group B while Group  
253 A is mostly *synj1/synj1*.

254

### 255 3.3. Assessment of Synaptojanin Gene Expression in Leukocytes

256 Since the studies presented in Fig. 1 revealed a possible association between decreased  
257 susceptibility and decreased expression of a bovine protein that *Salmonella* exploits during the  
258 infection process, we assessed the expression of the gene in leukocytes obtained from cattle  
259 exhibiting the various levels of susceptibility to *Salmonella*. RNA was isolated (and later Group-  
260 specifically pooled) from blood representing three of the Groups (Group C was not used because  
261 of the paucity of numbers). As shown in Fig. 3, synaptojanin gene expression was the lowest in  
262 Group D and the highest in Group A.

263

264 3.4. *Assessment of in vivo susceptibilities to Salmonella Newport across the SYNJI and synj1*  
265 *genotypes*

266 Since the preliminary *in vitro* and *ex vivo* studies revealed a possible link between  
267 decreased susceptibility to *Salmonella* in amelanotic calves possessing the *SYNJI* allele, calves  
268 with the nine possible combinations of *SYNJI*, *synj1*, *MCRI*, and *mcr1* genotypes were orally  
269 challenged with multi-resistant *Salmonella* Newport. Over the next two weeks, calves were then  
270 evaluated daily for four clinical signs of salmonellosis. As shown in Fig. 4, calves with the  
271 *SYNJI/SYNJI::mcr1/mcr1* genotype were least susceptible to salmonellosis. Specifically,  
272 euthanasia was required for all calves with any of the other eight genotypes whereas none of the  
273 *SYNJI/SYNJI::mcr1/mcr1* required euthanasia. Furthermore, increasing the dose 10-fold had no  
274 effect on the clinical outcome in *SYNJI/SYNJI::mcr1/mcr1* cattle.

275  
276 3.5. *Assessment of in vivo susceptibilities to Salmonella Anatum and Montevideo across the*  
277 *SYNJI and synj1 genotypes*

278 Calves were orally challenged with *Salmonella* Anatum and Montevideo. On day 14  
279 post-challenge, calves were euthanized and lymph nodes were recovered and subjected to  
280 quantitative culture of *Salmonella*. As shown in Fig. 5, *Salmonella* infiltration of the lymph  
281 nodes was markedly reduced in the *SYNJI/SYNJI::mcr1/mcr1* calves when compared to calves  
282 representing the other eight possible genotype combinations of *SYNJI*, *synj1*, *MCRI*, and *mcr1*.

283  
284 3.6. *Assessment of synj1 Genotypes in Cattle with Salmonella-free Lymph Nodes*

285 In order to correlate the absence of *Salmonella* with the *SYNJI*, *synj1*, *MCRI*, and *mcr1*  
286 genotypes, *Salmonella*-free lymph nodes from the Control group in a recent study (Feye et al.,

287 2016) were subjected to PCR-based genotyping targeting the *SYNJI* and *mcr1* genes. As shown  
288 in Fig. 6, the *Salmonella* load and prevalence were significantly lower in cattle with *SYNJI*/  
289 *SYNJI::mcr1/mcr1* genotype.

290

291 3.7. *Assessment of in vivo susceptibilities to E. coli O157:H7 colonization across the SYNJI and*  
292 *mcr1 genotypes*

293 Calves experimentally infected with *S. Anatum* and *Montevideo* were also infected with  
294  $10^{10}$  CFUs/kg of *E. coli* O157:H7. On day 14 post-challenge, recto-anal junction scrapings were  
295 collected and assessed for the presence of *E. coli* O157H7. As shown in Fig. 7, the load and  
296 prevalence of *E. coli* O157:H7 were significantly lower in *SYNJI/SNYJI::mcr1/mcr1* cattle.

297

298 3.8. *Small-scale Assessment of synj1 and SYNJI Genotypes in Various Cattle Breeds*

299 As shown in Fig. 8, the *SYNJI/SNYJI* genotype was present in the following *mcr1/mcr1*  
300 breeds: Akaushi, Barzona, Braunvieh, Hereford, Piedmontese, Red and White Holsteins, Red  
301 Angus, Red Poll, Shorthorn, Red Simmental, and Tarentaise. In these breeds, the prevalence of  
302 the *SYNJI/SNYJI* genotype was highly variable but the penetrance of the effect (as determined  
303 by *ex vivo* and/or *in vivo* studies) was near 100% in all breeds. For black breeds, the prevalence  
304 of the *SYNJI/SNYJI* genotype was also highly variable but the penetrance was near zero.

305

306 3.9. *Small-scale Assessment of Diminished Susceptibility to an Array of Salmonella serotypes*

307 Since our initial *ex vivo* studies and our *in vivo* studies used just four serotypes, additional  
308 studies were performed in order to assess the ability of an array of *Salmonella* serotypes to infect  
309 leukocytes from cattle being the *SYNJI/SNYJI::mcr1/mcr1* genotype. The *ex vivo* assay,

310 depicted in Fig. 1, was used with a pool of bovine-associated *Salmonella* serotypes incubated  
311 with leukocytes from 50 calves bearing the *SYNJI/SNYJI::mcr1/mcr1* genotype. Data from each  
312 animal was compared to the invasion and survival of SL1344 for that animal. As shown in Fig.  
313 9, about 50% of the samples exhibited enhanced susceptibility to infection when compared to  
314 that observed for SL1344. SNP analysis, comparing the 50k SNP profiles of the subset with  
315 enhanced susceptibility and reduced susceptibility to the pool of serotypes, revealed that three  
316 SNPs underlie this difference. The identities of the SNPs will not be revealed herein and are  
317 being investigated further. The “least” susceptibility phenotype was observed at varying  
318 frequencies in the breeds shown in Fig. 8.

319

#### 320 **4. Discussion**

321 *Salmonella* and *E. coli* O157:H7 are significant problems for the beef industry,  
322 representing two of the most important food safety hazards while *Salmonella* is additionally an  
323 animal health issue. Both of these microbes can be shed in feces and *Salmonella* is also present  
324 in lymph nodes that contaminate ground beef. Therefore, identifying novel interventions for  
325 both pathogens is needed especially considering that lymph node infiltration problem is difficult  
326 to mitigate since the lymph nodes cannot be decontaminated (Brichta-Harhay et al., 2008).

327 In this study, diminished susceptibilities to both pathogens were noted in a very specific  
328 subset of cattle that involved a SNP and a coat color genotype. This diminished susceptibility to  
329 *Salmonella* was identified using an *ex vivo* assay (Fig. 1) and this “resistance” phenotype was  
330 associated with a genotype (Fig. 2) and diminished expression of a bovine protein (Fig. 3)  
331 exploited by *Salmonella* during the infection process (Schleker et al., 2012b). The diminished

332 susceptibility was noted for clinical salmonellosis (Fig. 4) and lymph node infiltration (Figs. 5  
333 and 6). The effect also extended to diminished colonization of *E. coli* O157:H7 (Fig. 7).

334 The basis for the effect revolves around the *SYNJI/SYNJI* genotype in which  
335 synaptotjanin is poorly expressed in bovine cells, and thus it is not an absolute requirement for  
336 physiologic functions in cattle. Since *Salmonella* needs to exploit synaptotjanin during the  
337 infection process, it appears that the paucity of this protein restricts the invasion of the pathogen.  
338 However, this paucity alone is insufficient since the *mcr1/mcr1* genotype is also required for  
339 “resistance”. That is, the absence of the melanocortin 1 receptor is co-required. The  
340 melanocortin 1 receptor has other functions outside of pigmentation, including the beta-defensin  
341 and opioid pathways (Leoni et al. 2010). Reducing these other functions may contribute to the  
342 elimination of *Salmonella* and the closely related pathogen *E. coli* O157:H7 in *SYNJI/SYNJI*  
343 cattle, and this reduction is synergistic with the reduction in synaptotjanin.

344 We also identified a few *SYNJI/SYNJI* melanotic cattle exhibiting the resistance. These  
345 cattle possibly have other SNP(s) in the *Salmonella* interactome, and these other genetic  
346 elements may synergize with the diminished expression of synaptotjanin.

347 It is of note that the *SYNJI/SYNJI::mcr1/mcr1* genotype does not confer diminished  
348 susceptibility to all *Salmonella* serotypes. As shown in Fig. 9, other SNPs are required to extend  
349 the diminished susceptibility beyond the four serotypes assessed in Figs. 1-8.

350 The results of this study identify susceptible and resistant breeds of cattle, however, the  
351 molecular mechanisms resulting in these phenotypes has not yet been fully elucidated. It appears  
352 that a host protein exploited by *Salmonella* during the infection process (Schleker et al., 2012a) is  
353 minimally expressed in cattle with diminished susceptibility. It is also possible that the proteins



354 exploited by *Salmonella* during the infection process are hyper-expressed in the cattle with  
355 elevated susceptibility, *e.g.*, the melanotic cattle. Ongoing studies will address these hypotheses.

356

## 357 **5. Conclusions**

358 In summary, this study reveals differing susceptibilities to *Salmonella* infection and *E.*  
359 *coli* O157:H7 colonization in cattle. While we did not examine all breeds of cattle (including  
360 those from the *Bos indicus*) and we did not examine haplotypes in the “resistant” cattle, we  
361 found several breeds with a significant prevalence of the desired genotype. This work will  
362 provide the basis for identifying traits that could possibly be incorporated into cattle, in order to  
363 minimize the colonization of *Salmonella* and *E. coli* O157:H7 in the intestinal tracts of a major  
364 protein source. PSR Genetics LLC holds a U.S. patent on testing for the *SYNJI/SNYJI* genotype  
365 (patent number 9,049,848) while the three complementary SNPs are under further investigation.

366

## 367 **Acknowledgments**

368 The authors thank Dr. Ryan Saltzman for assistance in sample collection.

369

## 370 **Funding and Conflict of Interest**

371 This study was funded by PSR Genetics LLC which included a rental agreement for laboratory  
372 space at Iowa State University.

373

## 374 **References**

375 Brewer, M., Anderson, K., Yoon, I., Scott, M., Carlson, S., 2014. Amelioration of salmonellosis in pre-  
376 weaned dairy calves fed *Saccharomyces cerevisiae* fermentation products in feed and milk  
377 replacer. *Vet Microbiol.* 172, 248-255.

- 378 Brichta-Harhay, D., Arthur, T., Bosilevac, J., Kalchayanand, N., Schmidt, J., Wang, R., Shackelford, S.,  
379 Loneragan, G., Wheeler, T., 2012. Microbiological analysis of bovine lymph nodes for the  
380 detection of *Salmonella enterica*. *J. Food Prot.* 75, 854-858.
- 381 Brichta-Harhay, D., Guerini, M., Arthur, T., Bosilevac, J., Kalchayanand, N., Shackelford, S., Wheeler, T.,  
382 Koochmarai, M., 2008. *Salmonella* and *Escherichia coli* O157:H7 contamination on hides and  
383 carcasses of cull cattle presented for slaughter in the United States: an evaluation of prevalence  
384 and bacterial loads by immunomagnetic separation and direct plating methods. *Appl Environ*  
385 *Microbiol.* 74, 6289-6297.
- 386 Cargill, E., Nissing, N., Grosz, M., 2008. Single nucleotide polymorphisms concordant with the  
387 horned/polled trait in Holsteins. *BMC Res Notes.* 1, 128.
- 388 Carlson, S., McCuddin, Z., Rasmussen, M., Franklin, S., Sharma, V., 2007. Involvement of a *Salmonella*  
389 Genomic Island 1 Gene in the Rumen Protozoan-Mediated Enhancement of Invasion for  
390 Multiple-Antibiotic-Resistant *Salmonella enterica* Serotype Typhimurium. *Infect Immun* 72, 792-  
391 800.
- 392 Carlson, S., Meyerholz, D., Stabel, T., Jones, B., 2002a. Secretion of a putative cytotoxin in multiple  
393 antibiotic resistant *Salmonella enterica* serotype Typhimurium phagetype DT104. *Microbial*  
394 *Pathogenesis* 31, 201-204.
- 395 Carlson, S., Stoffregen, W., Bolin, S., 2002b. Abomasitis due to multiple antibiotic resistant *Salmonella*  
396 *enterica* serotype Typhimurium phagetype DT104. *Veterinary Microbiology* 85, 233-240.
- 397 Carlson, S., Wu, M., McCuddin, Z.P., Sharma, V.K., 2005. SlyA partially regulates the collagenase-  
398 mediated cytopathic phenotype specific for multiresistant *Salmonella enterica* serotype  
399 Typhimurium phagetype DT104. *Microbial Pathogenesis* 38, 181-187.
- 400 Feye, K., Anderson, K., Scott, M., Henry, D., Dorton, K., Depenbusch, B., Carlson, S., 2016. Abrogation of  
401 *Salmonella* and *E. coli* O157:H7 in Feedlot Cattle Fed a Proprietary *Saccharomyces cerevisiae*  
402 Fermentation Prototype. *J Veterinar Sci Technol* 7, 350.
- 403 Gianella, R.A., Washington, O., Gemski, P., Formal, S.B., 1973. Invasion of HeLa cells by *Salmonella*  
404 *typhimurium*: a model for study of invasiveness of *Salmonella*. *J. Infect. Dis.* 128, 69-75.
- 405 Gutiérrez-Gil, B., Wiener, P., Williams, J., 2007. Genetic effects on coat colour in cattle: dilution of  
406 eumelanin and phaeomelanin pigments in an F2-Backcross Charolais x Holstein population. *BMC*  
407 *Genet.* 8, 56.
- 408 Leoni, G., Voisin, M., Carlson, K., Getting, S., Nourshargh, S., Perretti, M., 2010. The melanocortin MC(1)  
409 receptor agonist BMS-470539 inhibits leucocyte trafficking in the inflamed vasculature. *Br J*  
410 *Pharmacol.* 160, 171-180.
- 411 Marcus, S., Wenk, M., Steele-Mortimer, O., Finlay, B., 2001. A synaptojanin-homologous region of  
412 *Salmonella typhimurium* SigD is essential for inositol phosphatase activity and Akt activation.  
413 *FEBS Lett.* 494, 201-207.
- 414 McCuddin, Z., Carlson, S., Sharma, V., 2008. Experimental reproduction of bovine *Salmonella*  
415 encephalopathy using a norepinephrine-based stress model. *Vet J.* 175, 82-88.
- 416 Penheiter, K.L., Mathur, N., Giles, D., Fahlen, T., Jones, B.D., 1997. Non-invasive *Salmonella typhimurium*  
417 mutants are avirulent because of an inability to enter and destroy M cells of ileal Peyer's  
418 patches. *Mol Microbiol* 24, 697-709.
- 419 Rasmussen, M., Carlson, S.A., Franklin, S.K., Wu, M.T., McCuddin, Z.P., Sharma, V.K., 2005. Exposure to  
420 rumen protozoa leads to enhancement of invasion and pathogenicity for multiple antibiotic  
421 resistant *Salmonella* bearing SGI-1. *Infect Immun.* 73, 4668-4675.
- 422 Schleker, S., Sun, J., Raghavan, B., Srnec, M., Müller, N., Koepfinger, M., Murthy, L., Zhao, Z., Klein-  
423 Seetharaman, J., 2012a. The current *Salmonella*-host interactome. *Proteomics Clin Appl.* 6, 117-  
424 133.

- 425 Schleker, S., Sun, J., Raghavan, B., Srnec, M., Müller, N., Koepfinger, M., Murthy, L., Zhao, Z., Klein-  
426 Seetharaman, J., 2012b. The current Salmonella-host interactome. *Proteomics Clin Appl.* 6, 117-  
427 133.
- 428 Schmidt, C., Persia, M., Feierstein, E., Kingham, B., Saylor, W., 2009. Comparison of a modern broiler line  
429 and a heritage line unselected since the 1950s. *Poult Sci.* 88, 2610-2619.
- 430 Seo, K., Mohanty, T., Choi, T., Hwang, I., 2007. Biology of epidermal and hair pigmentation in cattle: a  
431 mini-review. *Vet Dermatol.* 18, 392-400.
- 432 Sharma, V., Casey, T., 2014. *Escherichia coli* O157:H7 lacking the qseBC-encoded quorum-sensing system  
433 outcompetes the parental strain in colonization of cattle intestines. *Appl Environ Microbiol.* 80,  
434 1882-1892.
- 435 Smith, J., Fratamico, P., Gunther, N.t., 2014. Shiga toxin-producing *Escherichia coli*. *Adv Appl Microbiol.*  
436 86, 145-197.
- 437 Wray, C., Sojka, W.J., 1978. Experimental *Salmonella typhimurium* in calves. *Res. Vet. Sci.* 25, 139-143.
- 438 Wu, M.T., Carlson, S.A., Meyerholz, D.K., 2002. Cytopathic effects observed upon expression of a  
439 repressed collagenase gene present in *Salmonella* and related pathogens: mimicry of a  
440 cytotoxin from multiple antibiotic-resistant *Salmonella enterica* serotype Typhimurium  
441 phagetype DT104. *Microbial Pathogenesis* 32, 1-9.
- 442 Xiong, N., Brewer, M., Anderson, K., Carlson, S., 2013. Non-typhoidal *Salmonella* encephalopathy  
443 involving lipopolysaccharide in cattle. *Vet Microbiol.* 162, 285-287.
- 444 Xiong, N., Brewer, M., Anderson, K., Watrous, G., Weeks, K., Barnhill, A., Day, T., Kimber, M., Carlson, S.,  
445 2012. Beta-lactam antibiotics prevent *Salmonella*-mediated bovine encephalopathy regardless  
446 of the beta-lactam resistance status of the bacteria. *The Vet. J.* 192, 535-537.
- 447 Xiong, N., Brewer, M., Anderson, K., Weeks, K., Carlson, S., 2011. Expression of a collagenase that  
448 enables blood-brain barrier penetration for *Salmonella* implicated in bovine encephalopathies.  
449 *Microb Pathog.* 51, 230-232.
- 450 Xiong, N., Brewer, M., Day, T., Kimber, M., Barnhill, A., Carlson, S., 2010. Evaluation of the pathogenicity  
451 and virulence of three strains of *Salmonella* organisms in calves and pigs. *Am J Vet Res.* 71,  
452 1170-1177.

453

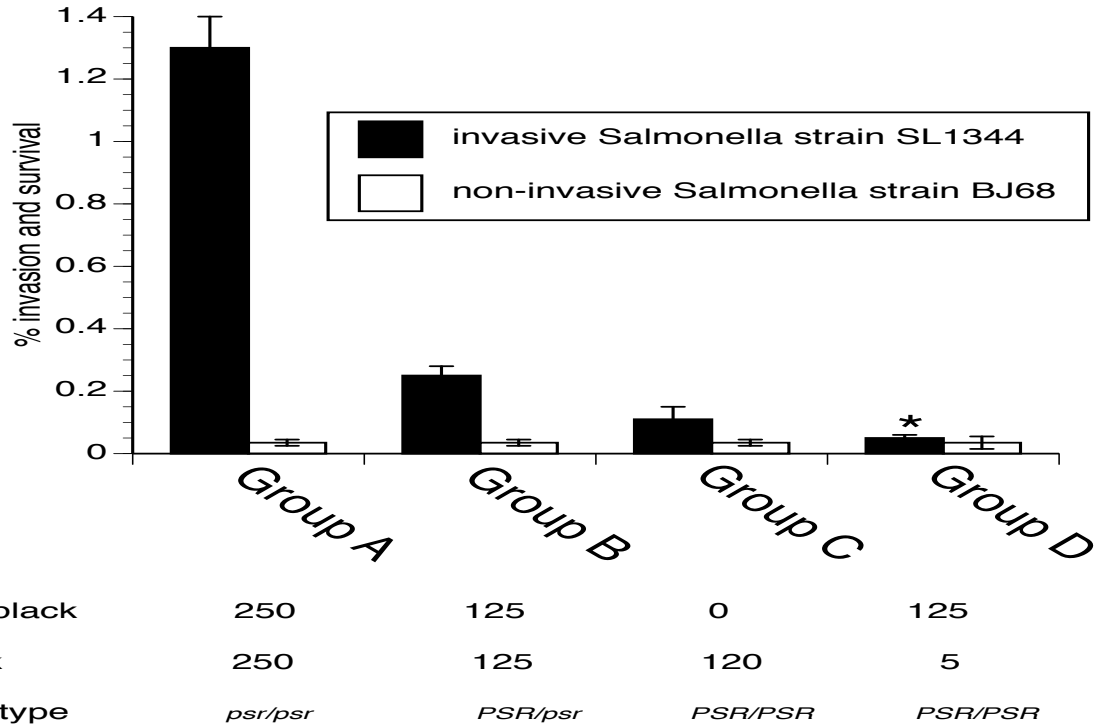

454

455 **Figure 1.** *Ex vivo* studies identifying amelanotic cattle blood cells that are less susceptible to infection by  
 456 *Salmonella*. Data represent are the mean  $\pm$  SEM for the % invasion and survival of *Salmonella* based on  
 457 an arbitrary clustering of results. Numbers below the Groups represent the number of amelanotic and  
 458 melanotic cattle represented in the given Group-specific data set. The bottom line of the embedded Table  
 459 depicts the predominate synaptojanin genotype in each Group. \* $P > 0.05$  versus the non-invasive strain.

460

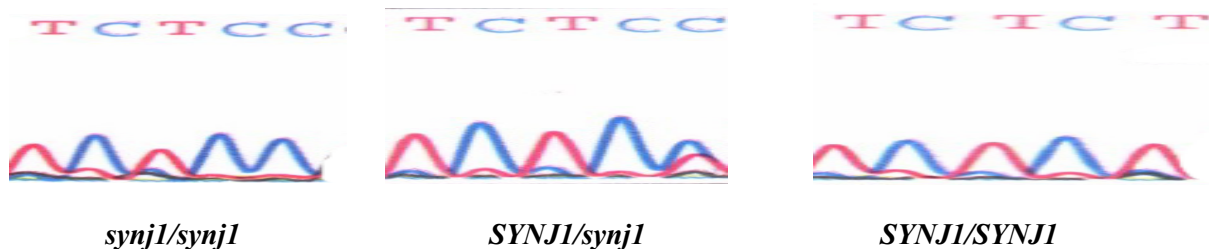

461

462

463 **Figure 2.** Chromatograms of the 3'UTR DNA sequencing obtained from cattle bearing the *synj1/synj1*,  
 464 *SYNJI/synj1*, and *SYNJI/SYNJI* genotypes. The region surrounding nucleotide 3981 (the far-right  
 465 nucleotide in each pane) was PCR-amplified and then subjected to standard dideoxynucleotide  
 466 sequencing. The terminal cytosine (C) is replaced with a thymidine (T) in one allele in the heterozygous  
 467 sequence (both red AND blue peaks) and in both alleles in the *SYNJI/SYNJI* sequence.

468

469

470

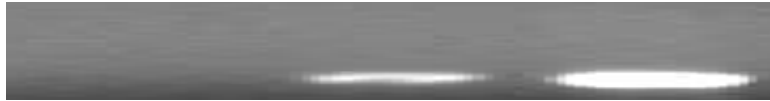

471

*Group A*

*Group B*

*Group D*

472

**Fig. 3.** Semi-quantitative analysis of synaptojanin expression in blood samples obtained from cattle representing the susceptibility Groups A, B, and D that have the predominate genotypes *synj1/synj1*, *SYNJ1/synj1*, and *SYNJ1/SYNJ1*, respectively. RNA was isolated from blood and semi-quantitative RT-PCR was performed using 12 cycles of amplification to delineate differences in synaptojanin mRNA transcript levels.

477

478

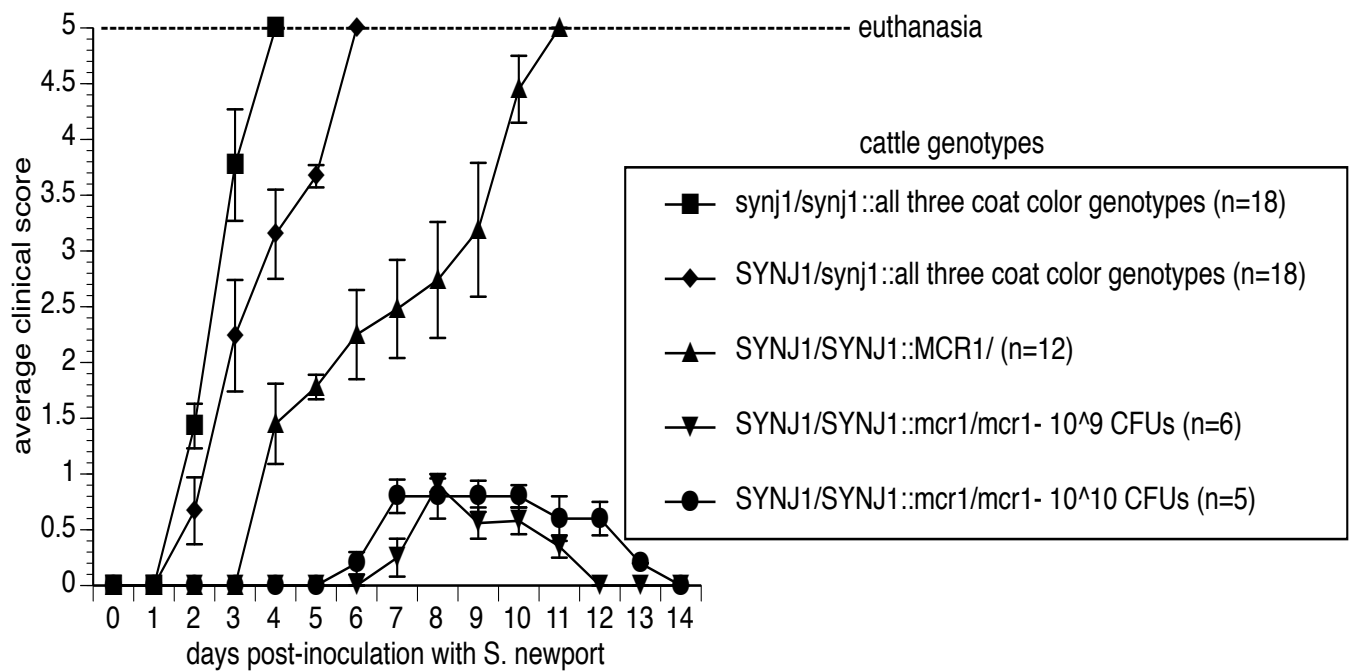

479

480

481

**Fig. 4.** *Salmonella* Newport infectivity of cattle in accordance with the *SYNJ1* and *MCR1* genotypes. Two to six month-old calves were orally infected with  $10^9$  (n=six animals/genotype) or  $10^{10}$  (n=5 animals) CFUs of *Salmonella* Newport. Each day after infection on day0, calves were monitored for signs of salmonellosis- fecal shedding of *Salmonella*, diarrhea, fever, and anorexia. The clinical score is an accumulation of scores for these four parameters in which a +1 is ascribed for each parameter observed on a given day. Calves requiring euthanasia were ascribed a score of five.

487

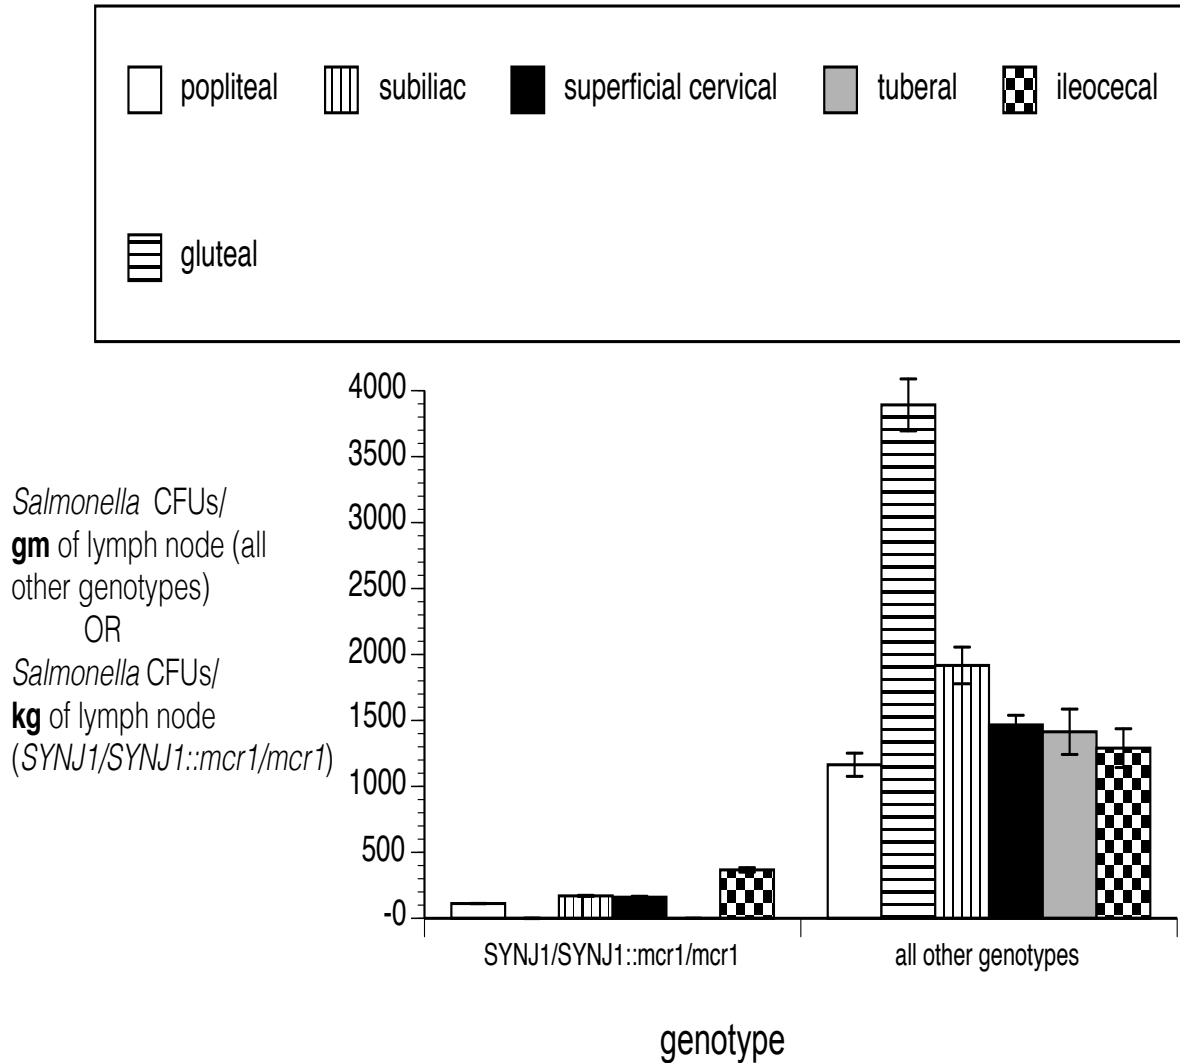

488

489

490 **Fig. 5.** Assessment of lymph node infiltration of *Salmonella* in *SYNJ1/SYNJ1::mcr1/mcr1* Cattle.  
491 Calves were experimentally infected with *Salmonella* Anatum and Montevideo and lymph nodes were  
492 recovered and *Salmonella* were enumerated in each lymph node. Data are presented, for scaling  
493 purposes, as *Salmonella* CFUs/gm or kg of lymph node for cattle of all other genotypes and  
494 *SYNJ1/SYNJ1::mcr1/mcr1* cattle, respectively. n=12 for the *SYNJ1/SYNJ1::mcr1/mcr1* and n=16 for the  
495 other eight genotypes (*i.e.*, two calves per genotype).

496

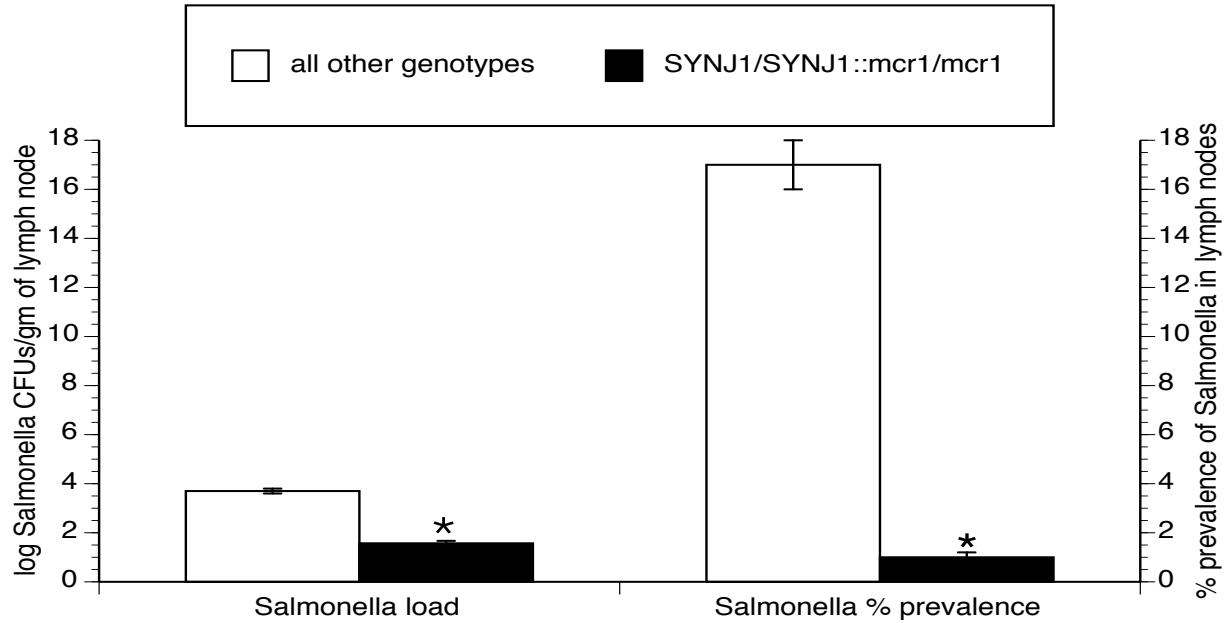

497

498 **Figure 6.** Assessment of lymph node infiltration by *Salmonella* in heifers of various genotypes from a  
499 previous study (Feye et al., 2016). *Salmonella* load and prevalence data from the previous study were  
500 individually segregated based on the *SYNJ1* and *mcr1* genotypes of each animal. Data represent the mean  
501  $\pm$  SEM from a total of 400 animals. \* $P < 0.05$  versus all other genotypes.

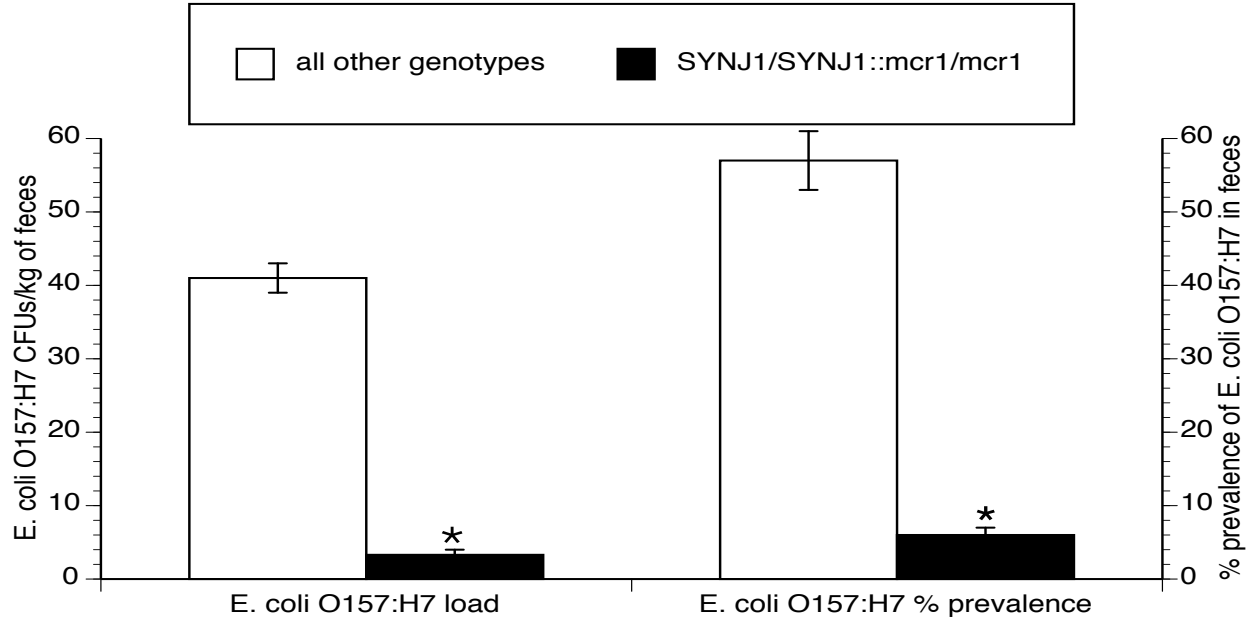

502

503 **Fig. 7.** Assessment of recto-anal junction colonization of *E. coli* O157:H7 in *SYNJ1/SYNJ1::mcr1/mcr1*  
504 Cattle. Calves were experimentally infected and recto-anal junction scrapings were recovered and *E. coli*  
505 O157:H7 were enumerated in each sample. Data are presented, for scaling purposes, as *E. coli* O157:H7  
506 CFUs/ kg of feces.  $n=12$  for the *SYNJ1/SYNJ1::mcr1/mcr1* and  $n=16$  for the other eight genotypes (i.e.,  
507 two calves per genotype). \* $P < 0.05$  versus all other genotypes.

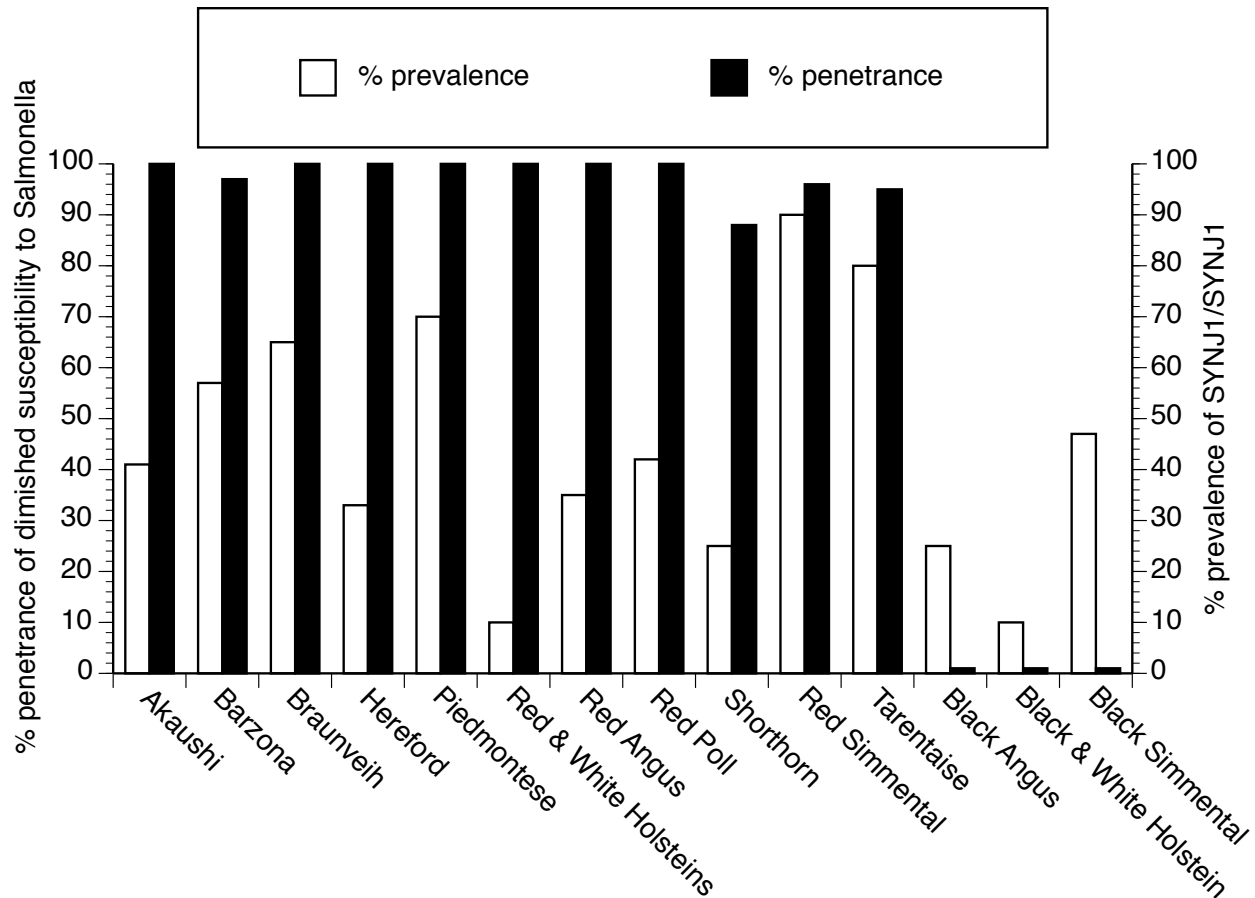

508

509 **Figure 8.** Small-scale assessment of *SYNJ1/SYNJ1* Genotypes and *Salmonella* susceptibility phenotypes  
 510 in various cattle breeds. Blood was obtained from the following *mcr1/mcr1* breeds: Akaushi (n=24),  
 511 Barzona (n=30), Braunvieh (n=100), Hereford (n=3), Piedmontese (n=35), Red and White Holsteins  
 512 (n=20), Red Angus (n=160), Red Poll (n=40), Shorthorn (n=4), Red Simmental (n=20), and Tarentaise  
 513 (n=40). Blood was also collected from the following *MCR1* breeds: Black and White Holsteins (n=250),  
 514 Black Angus (n=250), and Black Simmental (n=5). The *ex vivo* invasion and/or *in vivo* susceptibility  
 515 experiments were performed using the blood samples in order to determine the penetrance of the  
 516 diminished susceptibility relative to the presence of the *SYNJ1/SYNJ1* genotype. Diminished  
 517 susceptibility to salmonellosis was ascribed to samples in which the *ex vivo* invasion and survival of the  
 518 test strain of *Salmonella* (SL1344) was indistinct from that observed for the non-invasive *Salmonella*  
 519 strain BJ68, or when an animal did not require euthanasia in the *in vivo* *S. Newport* challenge studies  
 520 presented in Fig. 4.

521

522

523

524



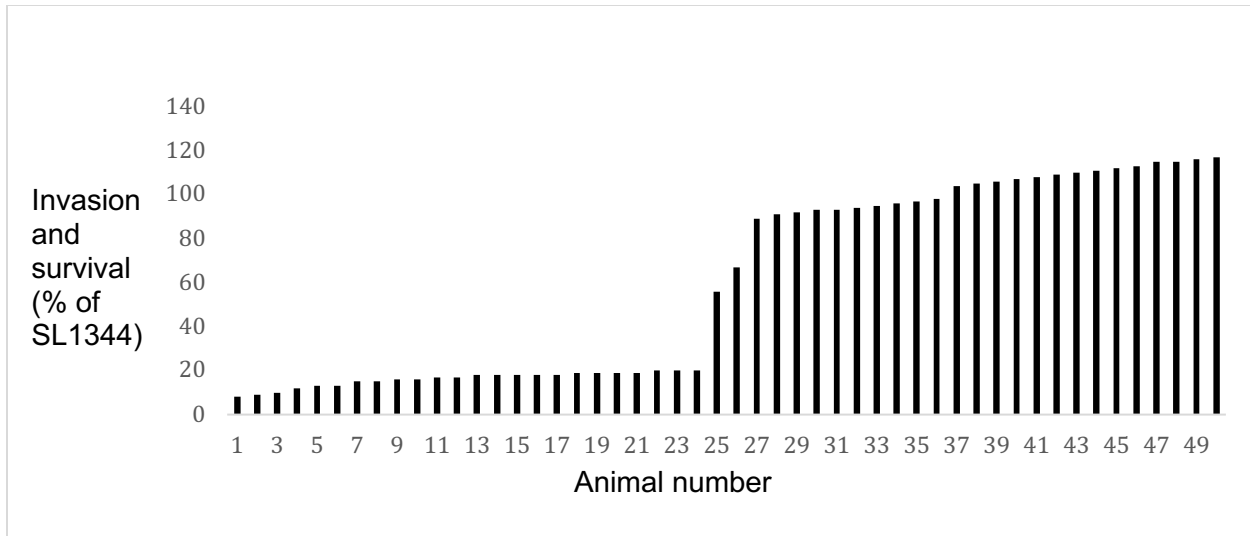

525

526 **Figure 9.** *Ex vivo* studies identify differential susceptibilities to 100 different *Salmonella* strains in  
527 *SYNJI/SYNJI::mcr1/mcr1* cattle. Leukocytes from 50 different *SYNJI/SYNJI::mcr1/mcr1* cattle were  
528 incubated with a pool of 100 different strains of *Salmonella* encompassing over 70 serotypes and  
529 *Salmonella* were recovered as described in experiments presented in Fig.1. Data were compared, on an  
530 individual animal basis, to that observed for the laboratory strain SL1344 that was used as the standard  
531 strain in experiments presented in Fig.1.
